# Supplementary material for: Translation of partially overlapping psbD-psbC mRNAs in chloroplasts: the role of 5′-processing and translational coupling
Source: PubMed Central journal article supplement — Nucleic Acids Res. 2011 Dec 8;40(7):3152–8. doi: 10.1093/nar/gkr1185 (PMC3326318; doi:10.1093/nar/gkr1185), 2011-12-08
Supplement: supp_gkr1185_nar-02614-v-2011-File008.pdf [file supp_gkr1185_nar-02614-v-2011-File008.pdf]

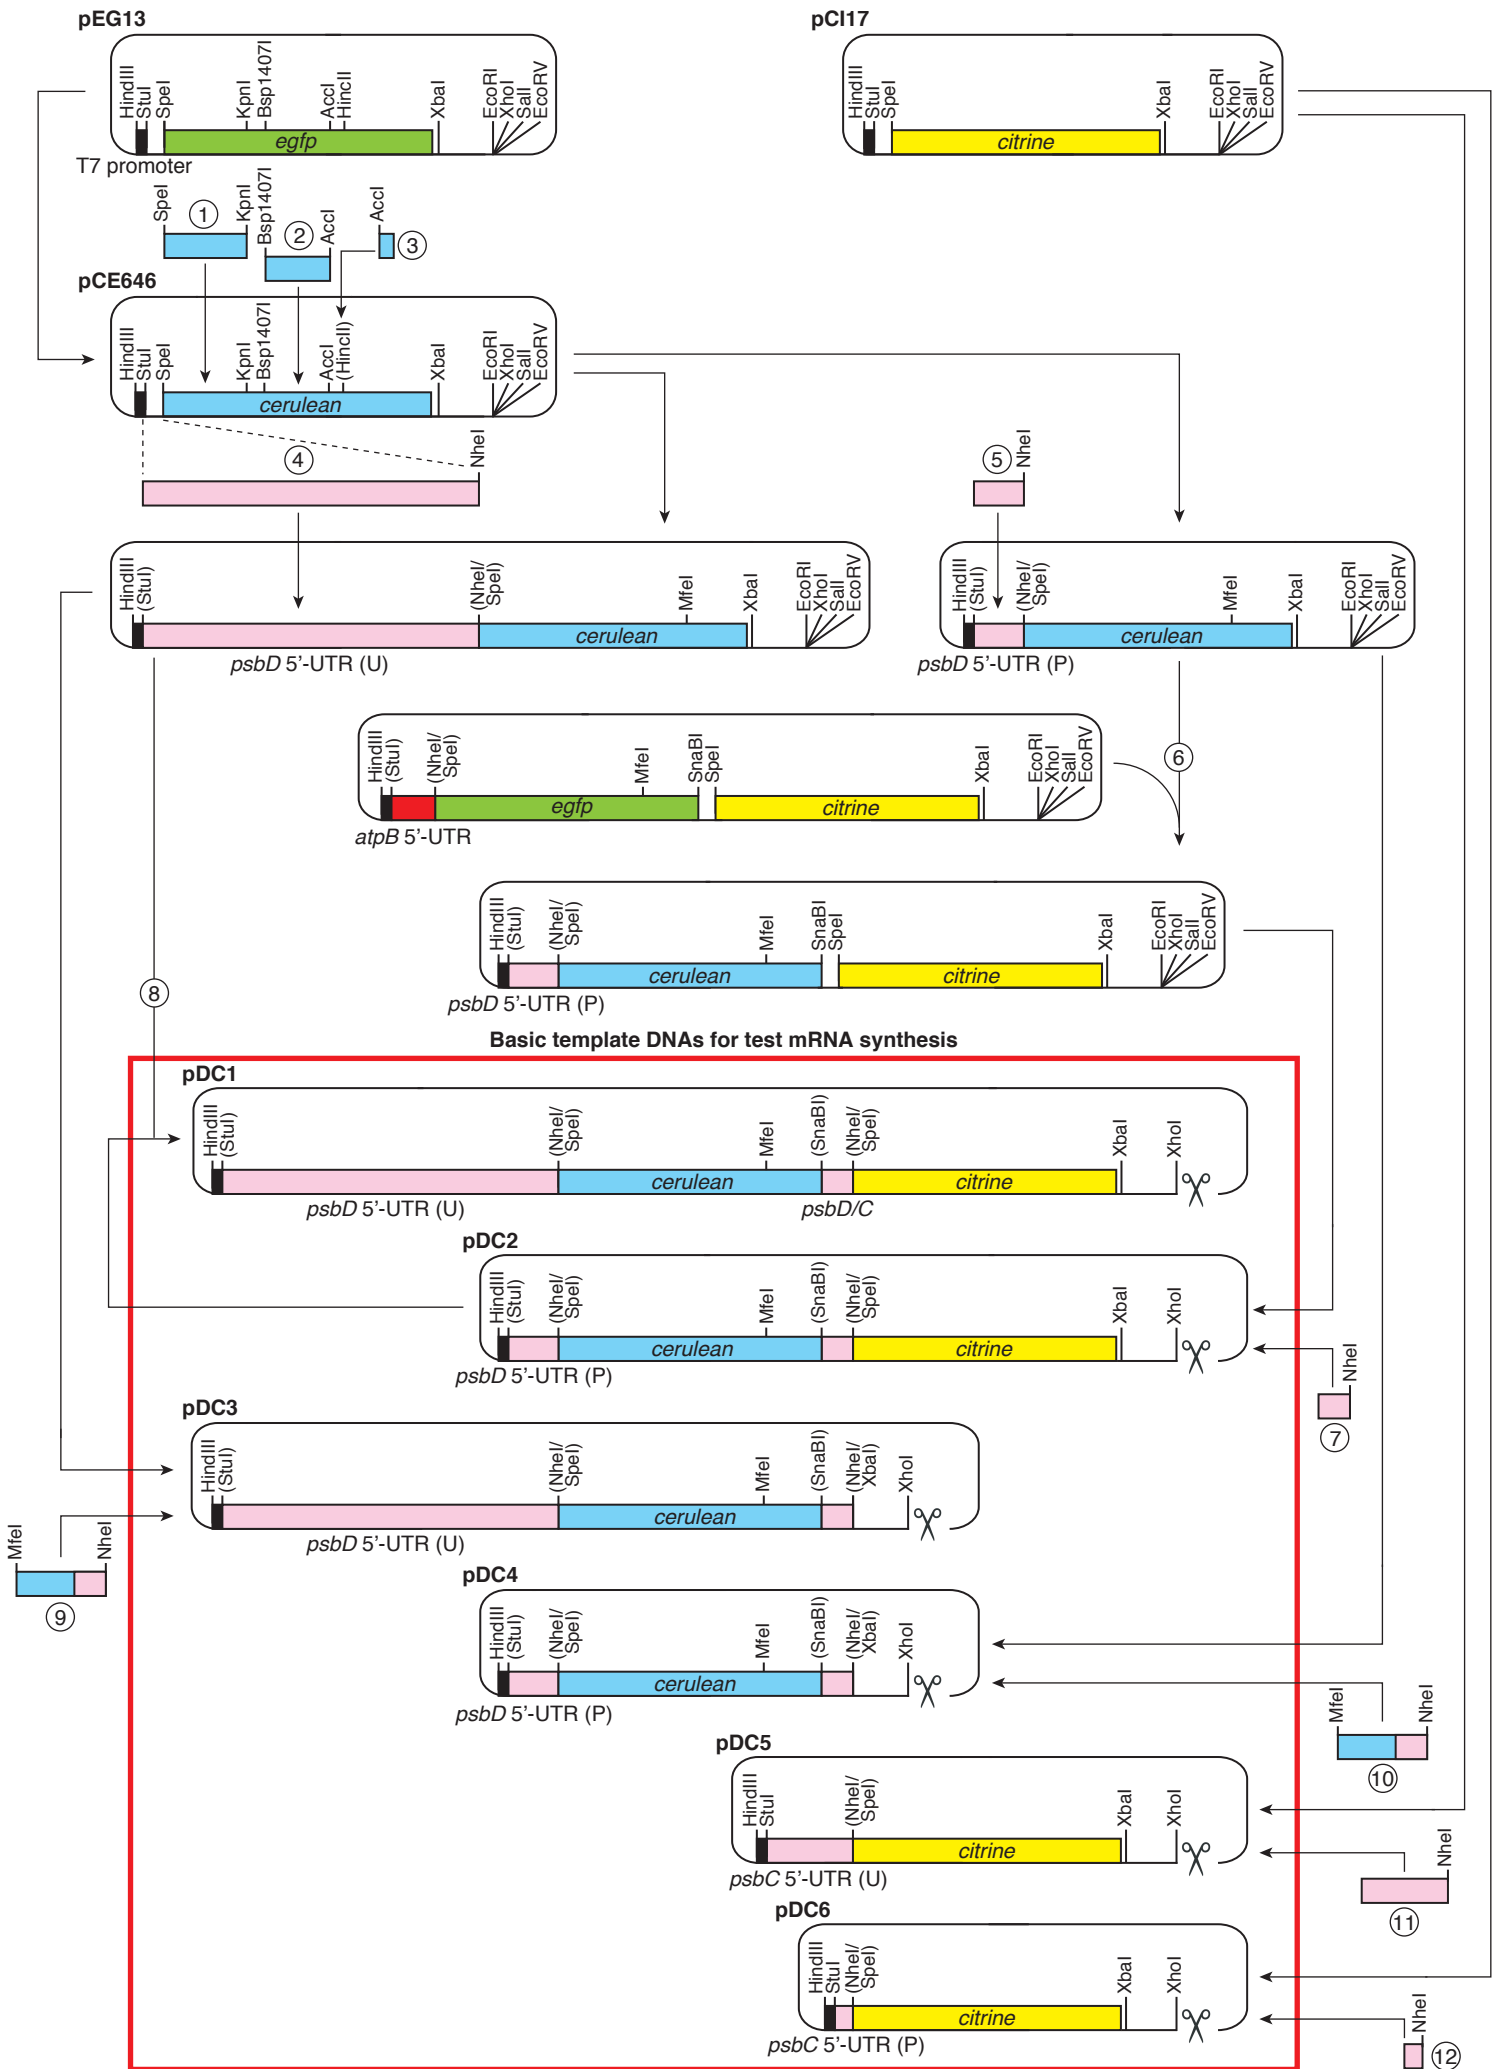

**Supplementary Figure S1.** Plasmid construction based on pUC18. Filled box, T7 promoter; cyan box, *citrine*; green box, *egfp*; yellow box, *citrine*; pink box, *psbD/C* portions; separated pink box, PCR products from the *psbD/C* in tobacco chloroplast DNA.

**Supplementary Figure S2.** Primers used in this study.

**Supplementary Figure S1:**

- ① On-1 and On-2 (template: plasmid pEG13)
- ② On-3 and On-4 (template: plasmid pEG13)
- ③ On-5 and On-6 (annealing)
- ④ On-7 and On-8 (template: chloroplast DNA)
- ⑤ On-9 and On-8 (template: chloroplast DNA)
- ⑦ On-10 and On-11 (template: chloroplast DNA)
- ⑨ and ⑩: On-1 and On-11 (template: plasmid pDC2)
- ⑪ On-12 and On-11 (template: chloroplast DNA)
- ⑫ On-13 and On-11 (template: chloroplast DNA)

**Figure 4:**

No 5'-UTR/AUG: On-14 and On-15 (annealing)

**Figure 5:**

A point mutation: On-1 and On-16 (template: pEG13)

On-1: 5'-CAGATCATATGAAACAACATGACTTTTTTCA  
On-2: 5'-GTGATGTATACATTATCTGAAATAGCGTTGTATTCCAATTTGTGTC  
On-3: 5'-CGCCAGGGTTTTCCCAGTCACGAC  
On-4: 5'-CTGGGTACCTAGCAAAGCATTGAACACCCCAAGTTAAAGTAGTGAC  
On-5: 5'-ATACATCACTGCAGACAAACAAAAGAATGGAATCAAAGCT  
On-6: 5'-AGCTTTGATTCCATTCTTTTGTCTGCTGCAGTGATGT  
On-7: 5'-GAAAATTCGATAGAGATGAAATTGGAGC  
On-8: 5'-CCGCTAGCCATAGTGATCCTCCTATTCAACTA  
On-9: 5'-GATTTTTATCTTCGAAACCCATTGGAAAG  
On-10: 5'-TGGATGGCGGCTCAAGATCAGC  
On-11: 5'-CCGCTAGCAGTTCCATTAAGAGCGTTTCCAC  
On-12: 5'-GTTATTTGTACCAGTAACCGGTTTATGG  
On-13: 5'-GATCAGCCTCATGAAAACCTTATATTC  
On-14: 5'-AGCTTGCTGTAATACGACTCACTATAGGG  
On-15: 5'-CTAGCCCTATAGTGAGTCGTATTACAGCA  
On-16: 5'-CCTCTAGATTATACGTATAGTTAATCCATGCCAAGTG

Dicistronic mRNA (Di)

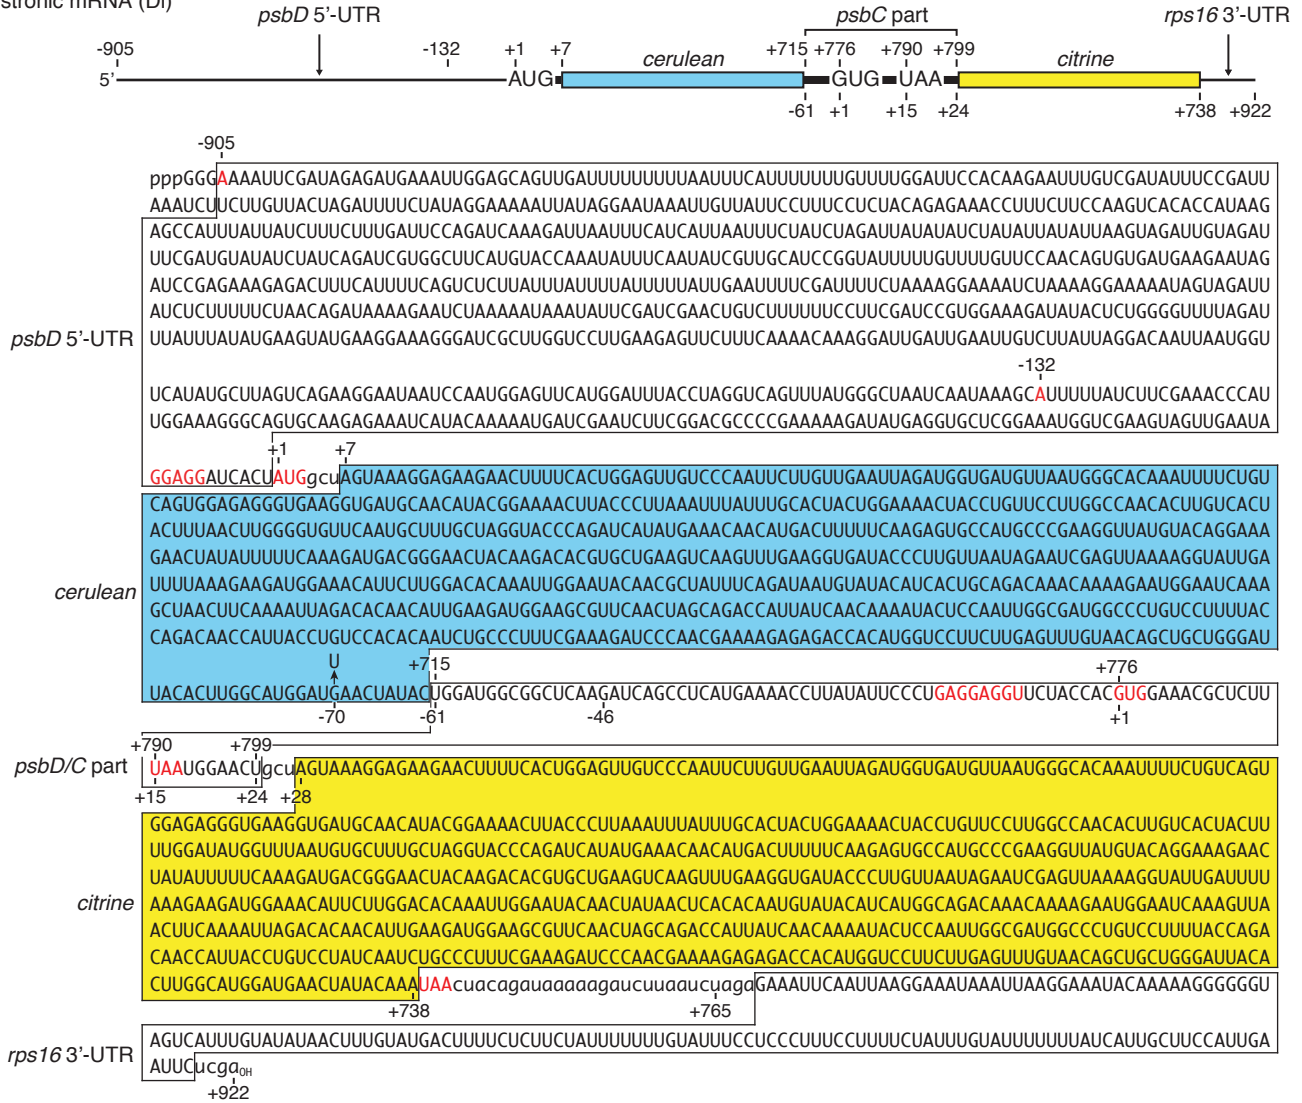

Monocistronic mRNA (Di)

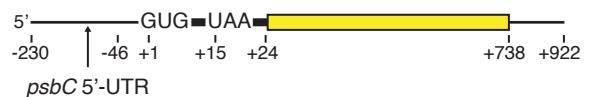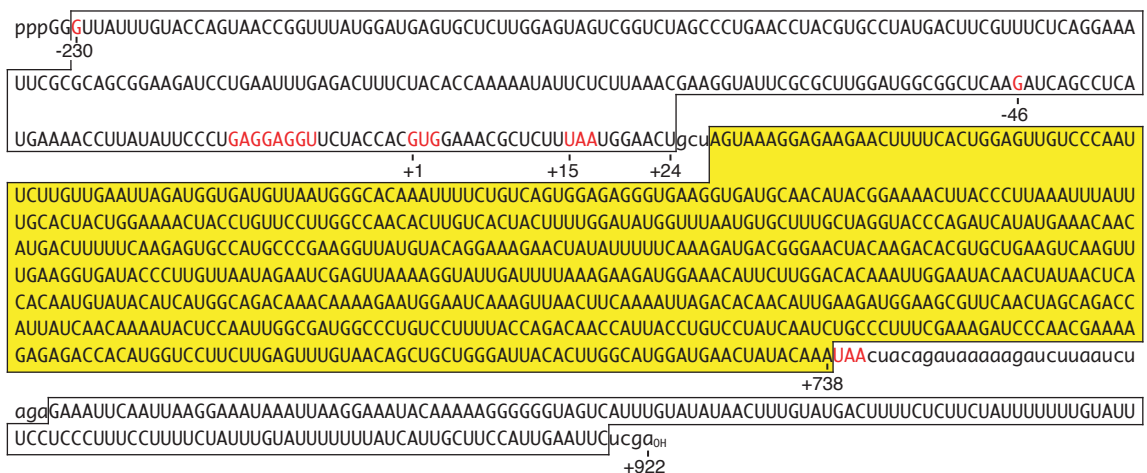

**Supplementary Figure S3.** The *psbD/C* test mRNA sequence. Deletion from +28 to +765 in the dicistronic mRNA provided the monocistronic *psbD* mRNA. T7 RNA polymerase adds two or three additional Gs at the 5'-end.

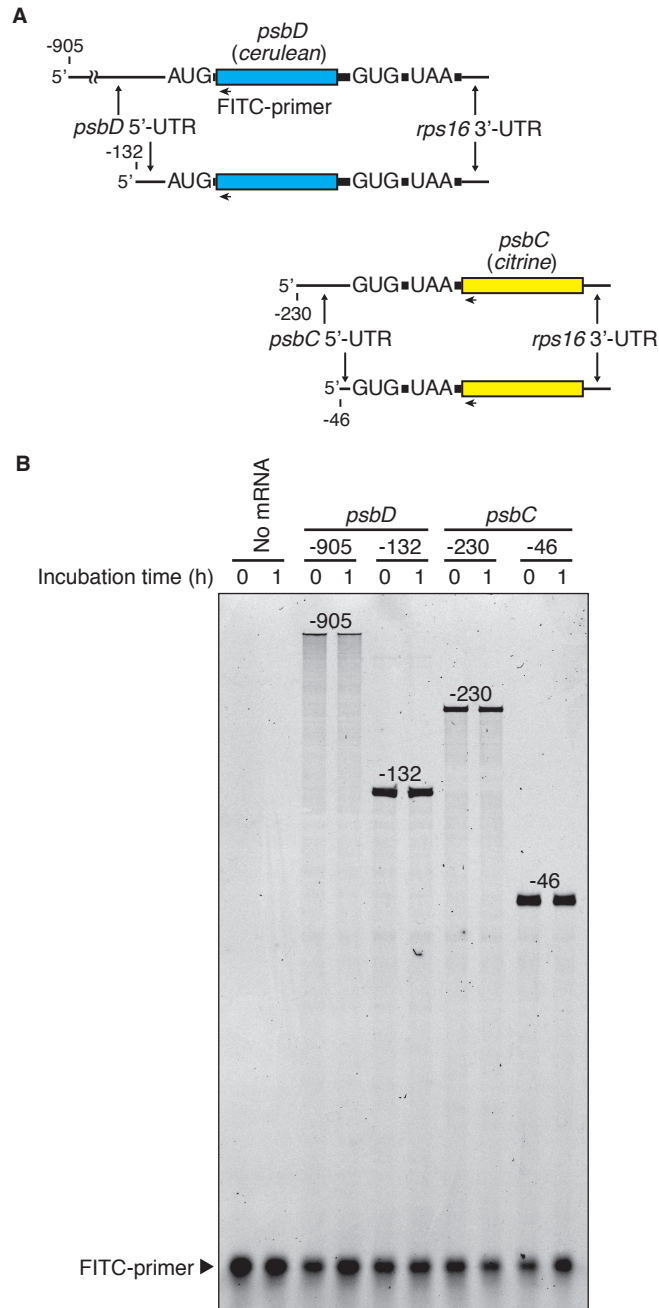

**Supplementary Figure S4.** Primer extension analysis of 5'-UTRs of the test mRNAs during 1-h *in vitro* translation reactions. **(A)** Monocistronic *psbD* and *psbC* test mRNAs and positions of FITC-labelled primers (left arrows)(see Figures 2A and 3A, respectively). **(B)** Gel patterns of the extended products. After incubation for 0 or 1 h, total RNA was isolated and subjected to primer extension.



|                    | -40        | -30         | -20        | <i>psbC</i> SD |            | <i>psbC</i> start codon |            | <i>psbD</i> stop codon |             | +30 |
|--------------------|------------|-------------|------------|----------------|------------|-------------------------|------------|------------------------|-------------|-----|
|                    |            |             |            | -10            |            | +1                      | +10        | +20                    |             |     |
| Tobacco            | CCUCAUGAAA | ACCUUUAUAAU | CCCU       | GAGGAG         | GU         | UCUACCAC                | GUGGAAACGC | UCUUJAAJGG             | AACUUUAGCCU |     |
| Tomato             | CCUCAUGAAA | ACCUUUAUAAU | CCCUGAGGAG | GUUCUACCAC     |            | GUGGAAACGC              | UCUUJAAJGG | AACUUUAGCCU            |             |     |
| Spinach            | CCUCAUGAAA | ACCUUUAUAAU | CCCUGAGGAG | GUUCUACCCC     |            | GUGGAAACGC              | UCUUJAAJGG | AACUUUAACUU            |             |     |
| Arabidopsis        | CCUCAUGAAA | ACCUUUAUAAU | CCCUGAGGAG | GUUCUACCAC     |            | GUGGAAACGC              | UCUUJAAJGG | AACUUUAGCUU            |             |     |
| Cucumber           | CCUCAUGAAA | ACCUUUAUAAU | CCCUGAGGAG | GUUCUACCCC     |            | GUGGAAACGC              | UCUUJAAJGG | AACUUUAGCUU            |             |     |
| Pea                | CCUCAUGAAA | ACCUUUAUAAU | CCCUGAGGAG | GUUCUACCAC     |            | GUGGAAACGC              | UCUUJAAJGG | AACUUUAGCUU            |             |     |
| Rice               | CCUCAUGAAA | AUCUUAUAAU  | CCCUGAGGAG | GUUCUACCAC     |            | GUGGAAACGC              | UCUUJAAJGG | AACUUUUGUUU            |             |     |
| Maize              | CCUCAUGAAA | AUCUUAUAAU  | CCCUGAGGAG | GUUCUACCAC     |            | GUGGAAACGC              | UCUUJAAJGG | AACUUUCGUUU            |             |     |
| Wheat              | CCUCAUGAAA | AUCUUAUAAU  | CCCUGAGGAG | GUUCUACCAC     |            | GUGGAAACGC              | UCUUJAAJGG | AACUUUCGUUU            |             |     |
| Black pine         | CCUCAUGAAA | ACCUUUAUAAU | CCCUGAGGAG | GUCCUACCCC     |            | GUGGAAACGC              | UCUUJAAJGG | AACUUAJAGCUU           |             |     |
| Wisk fern          | CCUCAUGAAA | ACCUUGUAUU  | CCCUGAGGAG | GUUCUACCCC     |            | GUGGAAACGC              | UCUUJAAJGG | AACUUUAUCGU            |             |     |
| Physcomitrella     | CCUCAUGAAA | AUCUUGUAUU  | CCCAGAGGAG | GUUCUACCAC     |            | GUGGAAACGC              | UCUUJAAJGG | AACCUUGGCUU            |             |     |
| Liverwort          | CCUCAUGAAA | AUCUUGUAUU  | CCCAGAGGAG | GUUCUACCCC     |            | GUGGAAACGC              | UCUUJAAJGG | AACUUUAGCUU            |             |     |
| Chlorella          | CCUCAUGAAA | AACUUGUAUU  | CCCUGAGGAG | GUUUUACCAC     |            | GUGGAAACGC              | UCUUJAAJGG | UUCGUUAGUUG            |             |     |
| Synechococcus 6301 | CCGCACGAAA | AAUUCGUCUU  | CCCCGAAGAG | GUUCUGCCCC     |            | GUGGUAACGC              | UCUCUAGJCC | UUCCGUGAUCG            |             |     |
| Synechocystis 6803 | CCCCAUGAAA | ACUUUAUCUU  | CCCUGAGGAG | GUUCUCCCC      |            | GUGGUAACGC              | UCUCUAAJAC | UUC--GAUGG             |             |     |
|                    | ** ** *    | ****        | * * * **   | ***            | ** ** ** * | * ** *                  | ****       | *****                  | *** ** *    | *   |

**Supplementary Figure S6.** Alignment of a sequence encompassing the *psbC* start codon.
